# Supplementary material
Source: publisher figshare collection journal article supplement (https://frontiersin.figshare.com/ndownloader/files/13076015)
Supplement: Supplementary file [file 13076015]

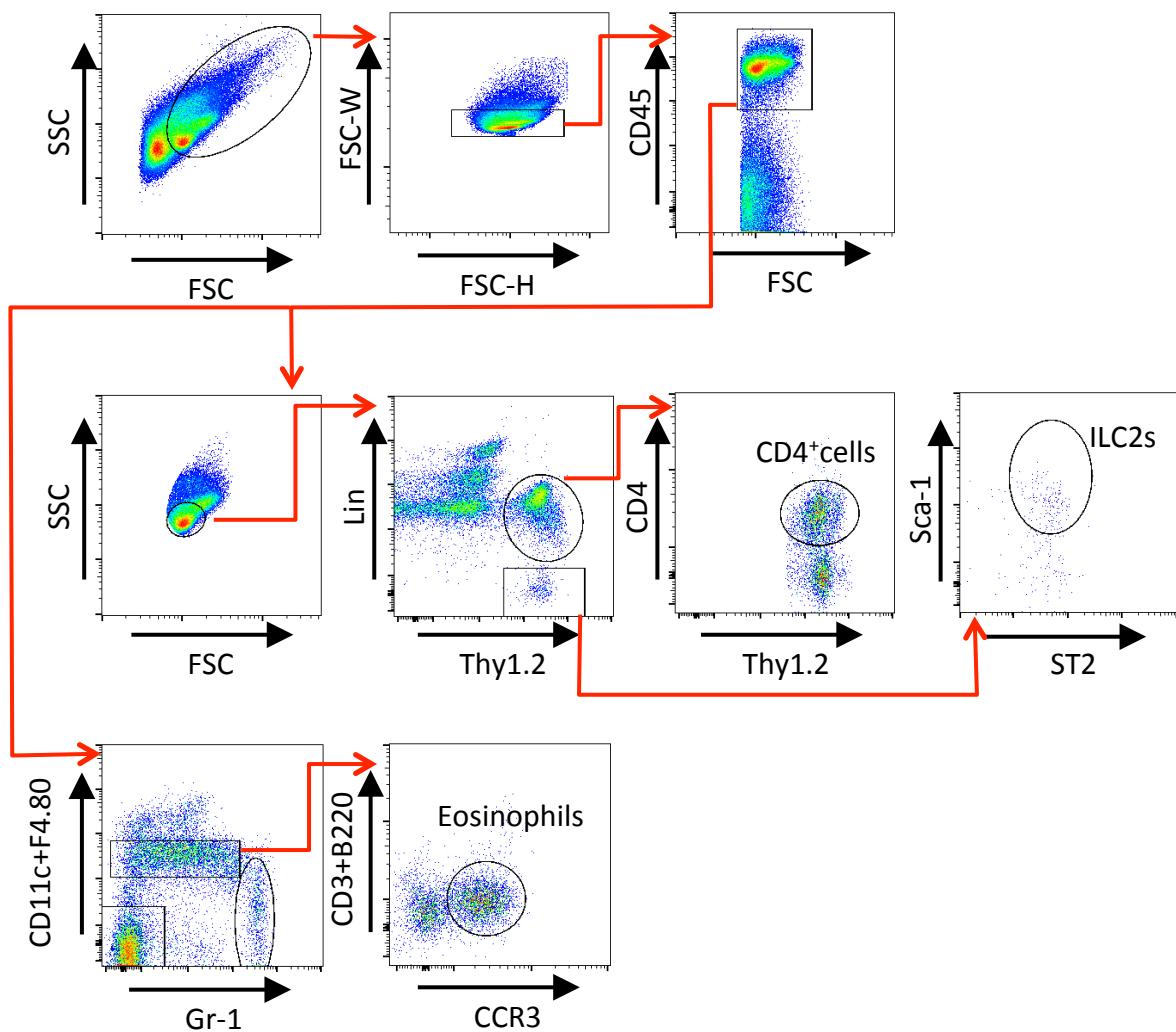

**Figure S6.** Gating strategy to quantify lung inflammatory cells in Figure 5. Cell populations of lung cells were analyzed by flow cytometry (SP6800) and defined as follows: Eosinophils, CD45<sup>+</sup>CD11c<sup>int</sup>CD3<sup>-</sup>B220<sup>-</sup>CCR3<sup>+</sup>; ILC2s, FSC<sup>lo</sup>SSC<sup>lo</sup>CD45<sup>+</sup>Thy1.2<sup>+</sup>Lin<sup>-</sup>Sca-1<sup>+</sup>ST2<sup>+</sup>; and CD4<sup>+</sup> cells, FSC<sup>lo</sup>SSC<sup>lo</sup>CD45<sup>+</sup>Lin<sup>+</sup>Thy1.2<sup>+</sup>CD4<sup>+</sup>.
